# Supplementary material
Source: PubMed Central journal article supplement (PMC1913755)
Supplement: plntcell_tpc.106.042911_1.pdf [file plntcell_tpc.106.042911_1.pdf]

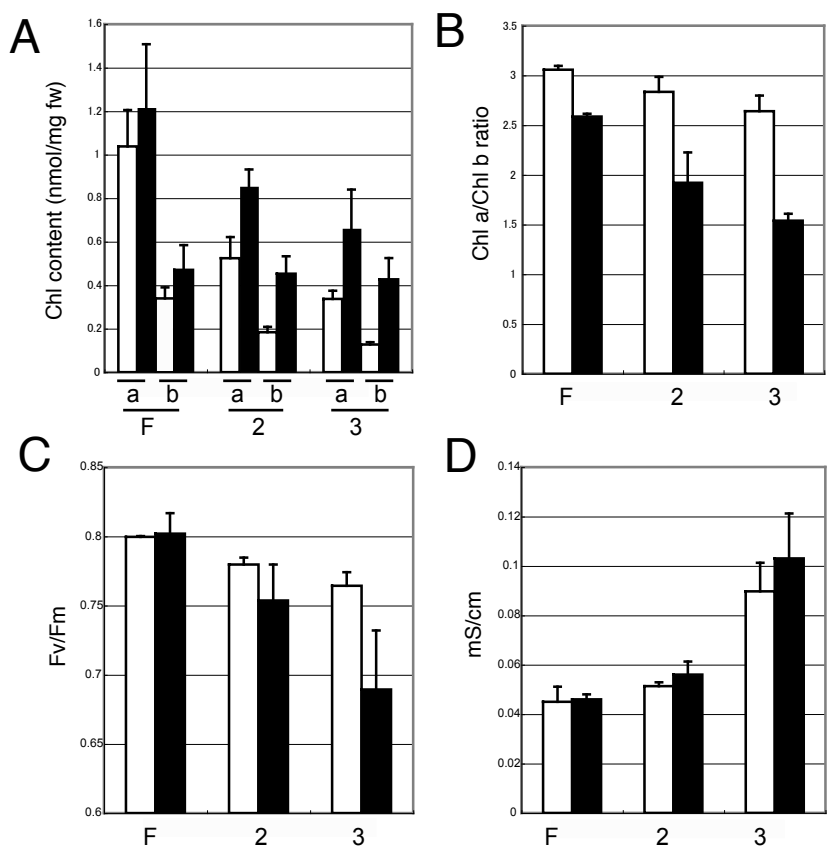

**Supplemental Figure 1.** Physiological changes in *nyc1* leaves during natural senescence. (A) Chlorophyll content of senescent leaves at 21 days after flowering. Detached leaves of the same fresh weight were extracted with the same volume of 80% acetone. Chlorophyll content was measured spectrophotometrically. Open bars, Koshihikari; filled bars, *nyc1-1*. a, Chl a; b, Chl b. F, flag leaf (last leaf); 2, second leaf; 3, third leaf. Thin bars indicate standard deviations. n = 3. (B) Chl a/b ratio of the same samples as in (A). (C) Fv/Fm values of senescent leaves at 21 days after flowering. n = 3. (D) Membrane ion leakage of senescent leaves at 21 days after flowering. n = 3.
