# Supplementary material
Source: PubMed Central journal article supplement (PMC1913755)
Supplement: plntcell_tpc.106.042911_2.pdf [file plntcell_tpc.106.042911_2.pdf]

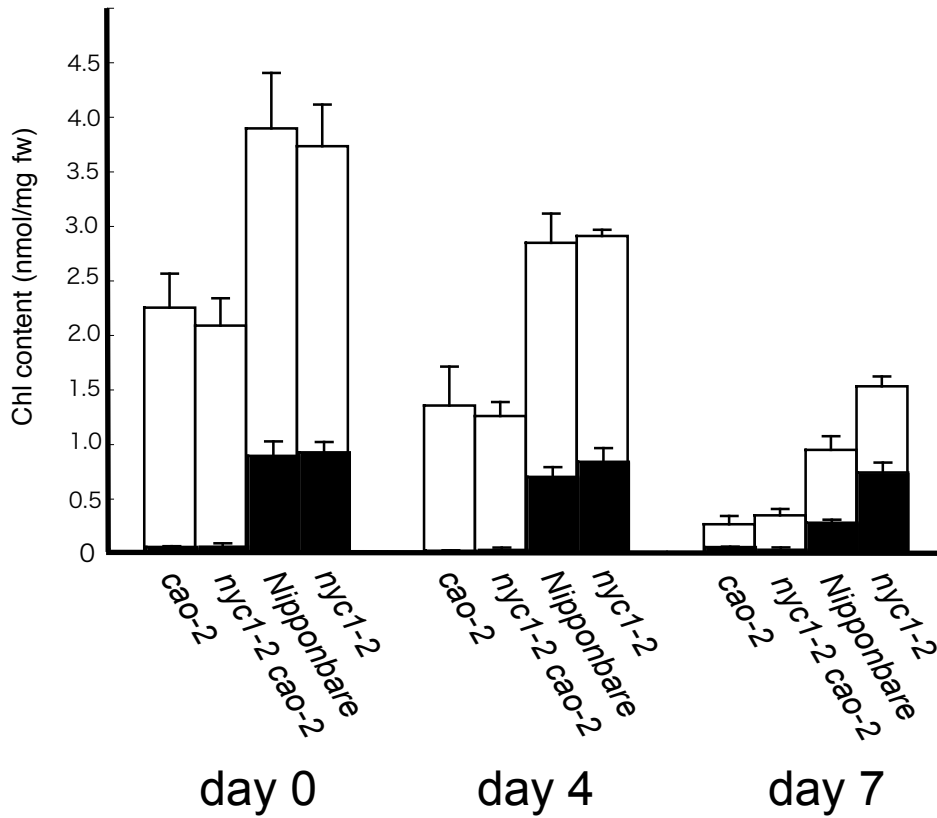

**Supplemental Figure 2.** Chlorophyll degradation in *nyc1-2 cao-2* double mutant. The change in the chlorophyll content of detached leaves during dark incubation is shown. Bars represent total chlorophyll content; white segments, Chl *a*; black segments, Chl *b*. Chlorophyll contents were measured spectrophotometrically. Thin bars indicate standard deviations.  $n = 3$ .
