# Supplementary material
Source: PubMed Central journal article supplement (PMC1913755)
Supplement: plntcell_tpc.106.042911_3.pdf [file plntcell_tpc.106.042911_3.pdf]

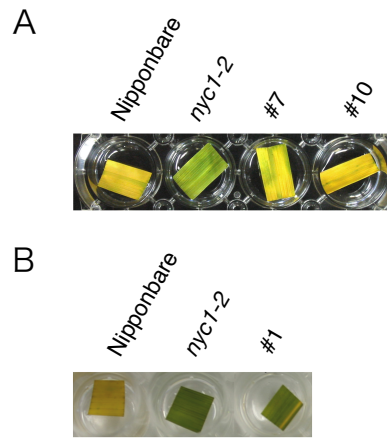

**Supplemental Figure 3.** Complementation tests of *nyc1*. (A) A complementation of *nyc1-2* by the NYC1 genomic fragment. Leaves at 7 DDI were shown. (B) A chimeric complementation of *nyc1-2* by the NYC1 genomic fragment. Leaves at 7 DDI were shown. A yellow stripe was observed in a transgenic plant (#1).
