# Supplementary material
Source: PubMed Central journal article supplement (PMC1913755)
Supplement: plntcell_tpc.106.042911_4.pdf [file plntcell_tpc.106.042911_4.pdf]

|               |     |                                                                                                       |     |
|---------------|-----|-------------------------------------------------------------------------------------------------------|-----|
| NYC1          | 172 | NVITGSTRGLGKALAREFLLSGDRVVIA-SRSPESVLQITINELLENIQEGLSVAKKKQREILLHAKVGTSCDVCKPEDVKKLVNFAKDELGSIDI---   | 267 |
| At NYC1       | 163 | NVITGSTRGLGKALAREFLLSGDRVIIVT-SRSSESVDMTVKELEQNLKEIMSNASESARKKLSDAKVVGIACDVCKPEDVEKLSNFVAVKELGSINI--- | 258 |
| NOL           | 75  | NVITGSTRGLGKALAREFLKAGDNVVIC-SRSAERVESAVTDLKKEFG-----QHVGIVCDVREGKDVKALVDFARDKMKYIDI---               | 155 |
| At NOL        | 78  | NVITGSTRGLGKALAREFLKAGDNVVIC-SRSAERVETAVQSLKEEFG-----HVGTKCDVTEGKDVRELVAYSQKNLKYIDI---                | 158 |
| Ot NOL        | 59  | RVITGSTRGLGLELARSFLTRGDKVFEVT-SRDAEKVRETVKALREEFGD-----DFVAGLEADVSRAESVEAVAEAVVDAFGGVDL---            | 138 |
| Ot SDR        | 41  | VCVITGGARGLGYHLARALVARSCAVVLA-SRDGARAETASRTLGAACAF-----ARCDVGETADVETLARRARETAERLDVDVV---              | 119 |
| Ct SDR        | 6   | GVVITGGSAGLGLAMAREFLRAGDRVVIC-SRRESNLKSALQMLGSDVPD-----RNVYGMVCDVSLPAQAADFAAFAAAKLGIIDR---            | 86  |
| Hh SDR        | 11  | GVVITGGSRGLGLAMAQRFLAAGDAVVLCA-ARDAERLEVARAELVTATGA-----GERLHTVACDVADPEAAERLADFAVERLGSIDR---          | 91  |
| Pa SDR        | 7   | GIVITGGSRGLGYALAKGFLNVGDRVVIC-ARNPEGVDSAVSSLLQSVDP-----GKIFGISCDVTNPEDACRLASFVAVSVLGSVDR---           | 85  |
| Pp SDR        | 33  | GVVITGGSRGLGYALALEFLAAGDRVVIC-GRNPGRLDEAIQTLQAVPS-----GEVYGVICDAGNPSGGRELAAFAAERLGRVDR---             | 113 |
| Ha SDR        | 23  | VIVITGGSRGLGLAMAEAMLQAGAKVVIA-GRDQASLEQALAKLKRQSSH-----VLATTCDVGDAAIEALRDQTIAQFGKLDV---               | 103 |
| Fj SDR        | 20  | KIVITGGTTGIGKAIADVLVSLGGRVLIF-GRDEKDFKNAVADIQKQFPG-----SEVYGTADVTKKEDIQKILEIADNELGGIDI---             | 101 |
| Ll 3-ketoacyl | 7   | NVITGSTRGIGKAIALQAKAGSNLIIN-GRSA-ISEELLALEFTAYGVK-----AVGISGDISKSEDAKQMVAAEAIETLGSVDI---              | 84  |
| At 3-oxoacyl  | 77  | VVITGASRGIGKAIALALGKAGCKVLVNYARSAKEAEVAKQIEEYGGQ-----AITFGGDVSKATDAMDMMKALDKWGTIDV---                 | 156 |
| Os 3-oxoacyl  | 78  | VVITGASRGIGKAIALALGKAGCKVLVNYARSSKEAEVSKIEEACGGQ-----AITFGGDVSKADVDSMMKAAALDKWGTIDV---                | 157 |
| NYC1          | 268 | -WINNAGTN-KGFRPLVNFSDEDIISQIVSTNLVGSLLCTREAMNVMQHQKQK-----GHVFNMDGAGSGGSSTPLTAV-YGSTKCGLRQFQASLLKESRR | 359 |
| At NYC1       | 259 | -WINNAGTN-KGFRPLLEFTEEDITQIVSTNLIGSILCTRGAMDVMSRQHS-----GHIFNMDGAGSGGSSTPLTAV-YGSTKCGLRQFHGSIVKESQK   | 350 |
| NOL           | 156 | -WINNAGSNAYSYPKLVETSDEALMEVITNTLGLMICCREAINMNRNPRG-----GHIFNIDGAGSDGRPTPRFAA-YGATKRSVHLLTKSLQAELOM    | 248 |
| At NOL        | 159 | -WINNAGSNAYSFKPLAEASDEDLIEVVKNTLGLMICCREAMNMLTQSRG-----GHIFNIDGAGSDGRPTPRFAA-YGATKRSVHLLTKSLQAELOM    | 251 |
| Ot NOL        | 139 | -WINNAGSNGYAYENLEADPLVLQEIIVMTNSLGSLLCTRQAIRTMRKTSGR-----GHIFNMEGAGSDGSATRKFAA-YGHTKAGMAQLSKTMAVEKLG  | 231 |
| Ot SDR        | 120 | YWINNAGAV-TKNAPLCDVDAREISAVVRANLGLPLGARTCERLARETSKR-----VVVFNF-GFSDWGANLSKSAATHKSTKTLGLSALTKALNAEVRA  | 212 |
| Ct SDR        | 87  | -WINNAGTAGRKRPLWELDLSDIDETCRTNLGSMMLCAEALRVMLRQPASADEPLYHLFNM-GFSAGLRSSPTSVPHRASKRAVAIMSKLLRQLEA      | 184 |
| Hh SDR        | 92  | -WINNAGTAGRKRPLWELDLSDIDETCRTNLGSMMLCAEALRVMLRQPASADEPLYHLFNM-GFSAGLRSSPTSVPHRASKRAVAIMSKLLRQLEA      | 188 |
| Pa SDR        | 86  | -WINNAGTAGRKRPLWELDLSDIDETCRTNLGSMMLCAEALRVMLRQPASADEPLYHLFNM-GFSAGLRSSPTSVPHRASKRAVAIMSKLLRQLEA      | 175 |
| Pp SDR        | 114 | -WINNAGTAGLFRKPLWELDLSDIDETCRTNLGSMMLCAEALRVMLRQPASADEPLYHLFNM-GFSAGLRSSPTSVPHRASKRAVAIMSKLLRQLEA     | 201 |
| Ha SDR        | 104 | -WINNAGVA-GPYGATVAIHPDYRRVIDTNIIFGTIYHGSITALKYFQQQGH-----GKLLINLFGRGDTGPVPFQTA--YGASKSWRNFTLALAKEHRN  | 200 |
| Fj SDR        | 102 | -LWINNAGALG---APGITNESYDDYKYIIDTNIITGYLAFAQEAASRMKQKKS-----GHIINI-GMSAESKEAKSTI-YVATKSAIRGFSTSLRKLNP  | 188 |
| Ll 3-ketoacyl | 85  | -LVNNAAGIT--RDGLSLKMSSEDFESVLKINLTGAFNMTQAVLKPMTRARS-----GAIINI--SSVVGMLMGNAQANYAASKAGLIGLTKSIAREVAA  | 173 |
| At 3-oxoacyl  | 157 | -VVNNAAGIT--RDTLLIRMKQSQWDEVIALLNLTGVFLCTQAAVKIMMKKKR-----GRIINI--SSVVLIGNIGQANYAASKAGLIGLTKSIAREVAA  | 245 |
| Os 3-oxoacyl  | 158 | -LVNNAAGIT--RDTLLIRMKKSQWQDVIDLNLTVFLCTQAATKIMMKKKK-----GKIIINI--ASVVGLVGNIGQANYAASKAGLIGLTKTVAREYAS  | 246 |
| NYC1          | 360 | SKVG----VHTASPGMVLTDLLLSG                                                                             | 380 |
| At NYC1       | 351 | TNVG----LHTASPGMVLTDLLLSG                                                                             | 371 |
| NOL           | 249 | NEVN-NVMVHNLSPGMVTTDLLMSG                                                                             | 269 |
| At NOL        | 252 | QDVK-NVVVHNLSPGMVTTDLLMSG                                                                             | 275 |
| Ot NOL        | 232 | SSIG----VHTISPGMVFTELISG                                                                              | 255 |
| Ot SDR        | 213 | MSPPIRCEFHLSPGLALTRVLLGN                                                                              | 237 |
| Ct SDR        | 185 | AGIR-SVGIHELSPGLVLTDLRLD                                                                              | 208 |
| Hh SDR        | 189 | SGEQ-GIGVHELSPGLVLTDLRLD                                                                              | 212 |
| Pa SDR        | 176 | AGIS-GIGVHEVSPGLVLTDLRLD                                                                              | 196 |
| Pp SDR        | 202 | AGKT-SIGVHEVSPGLVLTDLRFQD                                                                             | 222 |
| Ha SDR        | 201 | QGIE----ILGFNPGLMTDMLTDV                                                                              | 224 |
| Fj SDR        | 189 | LGIK----VSLIEPGAVTSDMQPGT                                                                             | 222 |
| Ll 3-ketoacyl | 174 | RNVR----VNAVAPGFIESDMTEVL                                                                             | 194 |
| At 3-oxoacyl  | 246 | RNIN----VNVVCPGFIASDMTAEI                                                                             | 266 |
| Os 3-oxoacyl  | 247 | RNIN----VNAIAPGFIASDMTAEI                                                                             | 267 |

**Supplemental Figure 4.** Multiple alignment of SDR sequences.

SDR domains of NYC1, NOL and related sequences are aligned. Identical amino acid residues are reversed out. Important residues conserved in the 'classical SDR' are marked with asterisks. The numbers start from the first methionine of each sequence. Triangles indicate the residues important for the selection of the cofactor.
