# Supplementary material
Source: PubMed Central journal article supplement (PMC1913755)
Supplement: plntcell_tpc.106.042911_5.pdf [file plntcell_tpc.106.042911_5.pdf]

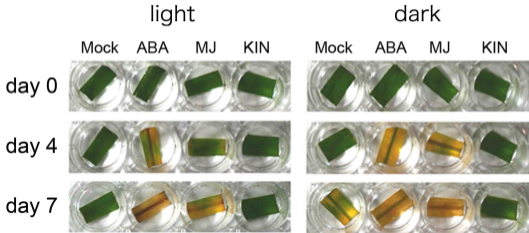

**Supplemental Figure 5.** Dark and hormonal regulation of leaf senescence in rice. Mock, 3 mM 2-morpholino ethanesulfonic acid (pH 5.8); ABA, 50  $\mu$ M abscisic acid; MJ, 50  $\mu$ M methyl jasmonate; KIN, 50  $\mu$ M kinetin.
